# Supplementary material
Source: PubMed Central journal article supplement (PMC3834846)

Supplementary Figure S1  
Mattes T.E.

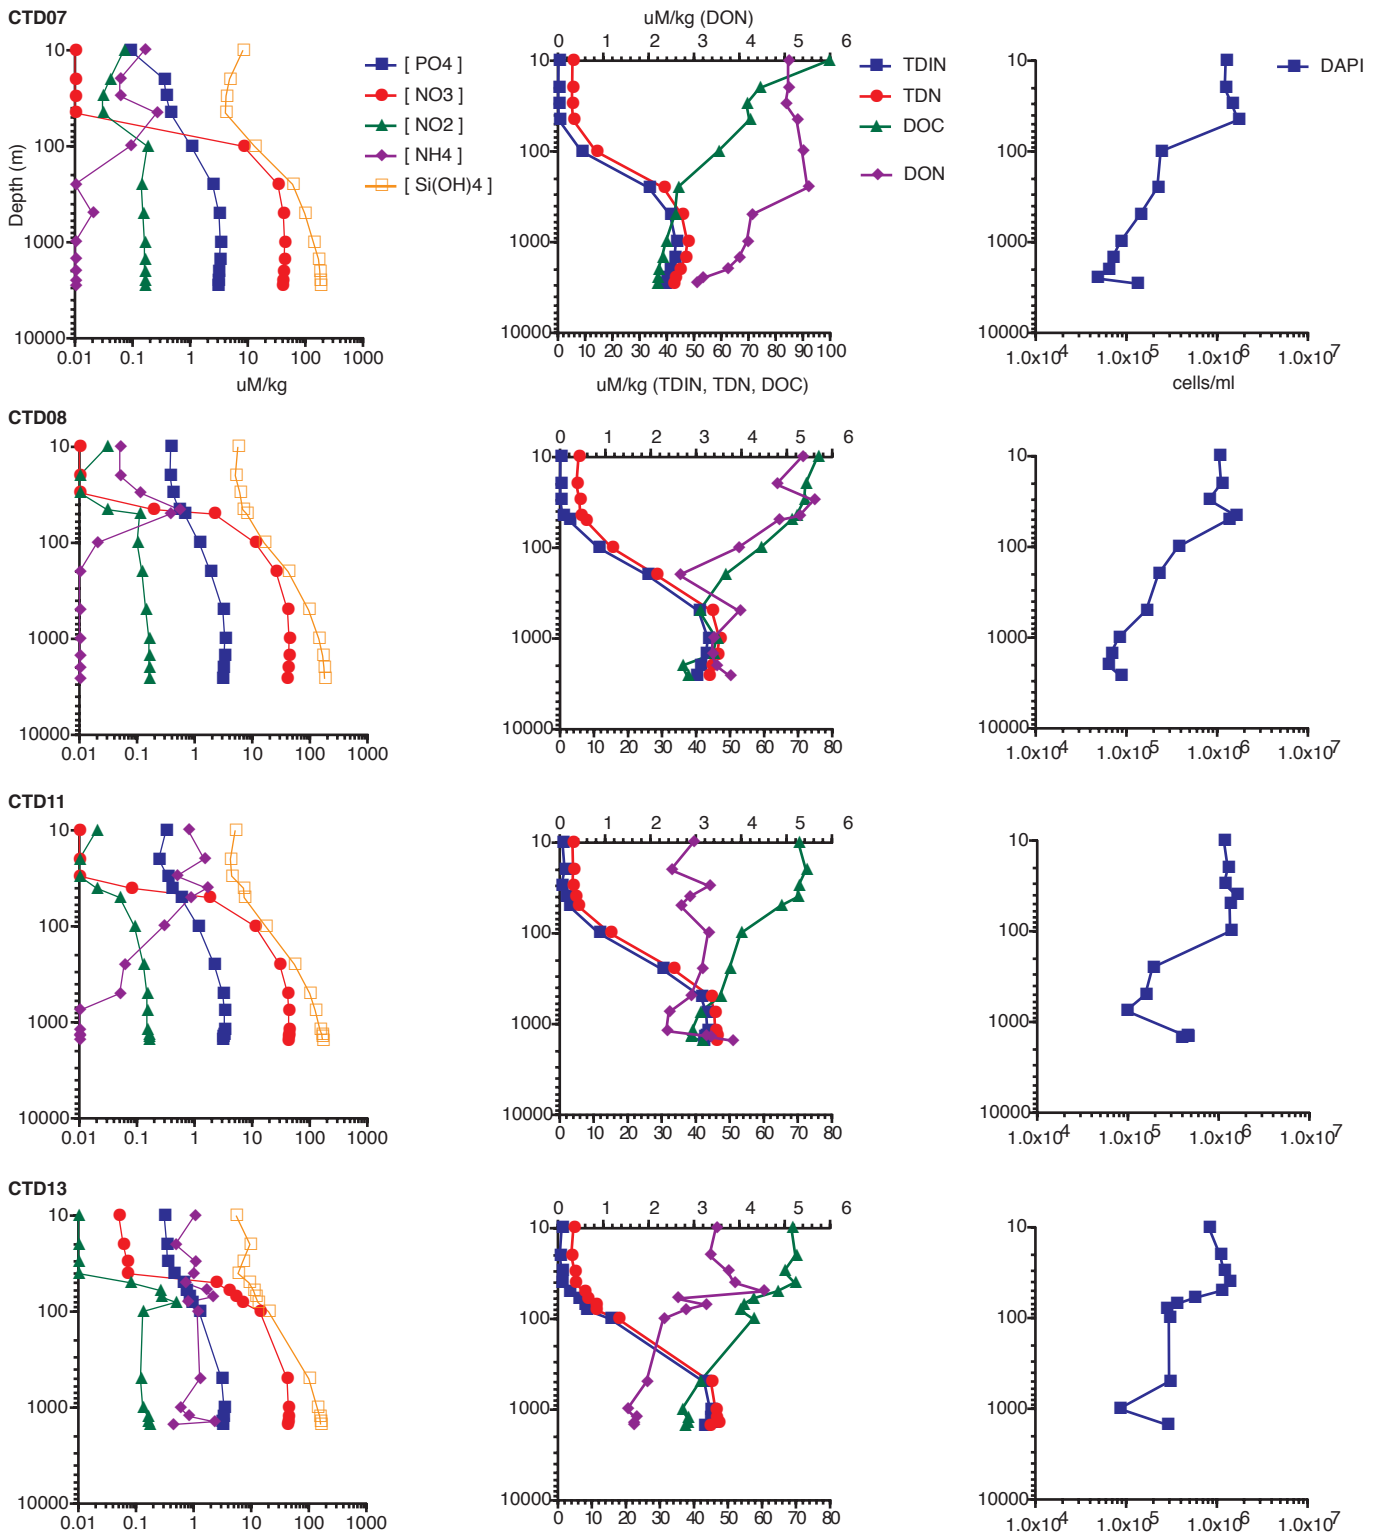

Supplement: ismej2013113x1.pdf [file ismej2013113x1.pdf]
